# Supplementary material for: Centimeter-level double perovskite single crystals with strong interlaminar hydrogen bonds for high-performance X-ray detection
Source: Royal Society of Chemistry journal article supplement (doi:10.1039/d4tc04488f), 2024-12-04
Supplement: d4tc04488f1.pdf [file d4tc04488f1.pdf]

## Supporting Information

### **Centimeter-Level Double Perovskite Single Crystals with Strong Interlaminar Hydrogen Bonds for High-performance X-ray Detection**

*Linjie Wei,<sup>a</sup> Yi Liu,<sup>\*a,b</sup> Yu Ma,<sup>a,b</sup> Qingshun Fan,<sup>a,b</sup> Liwei Tang,<sup>a,b</sup> Jingtian Zhang,<sup>a</sup>*

*Junhua Luo<sup>a,b</sup> and Zihua Sun<sup>\*a,b</sup>*

## Experimental Section

*Material preparation:* The chemical reagents and solvents were purchased and used directly without further purification, including 4-aminomethyl-1-cyclohexane carboxylate (97%, Adamas), silver oxide ( $\text{Ag}_2\text{O}$ , 98%, Adamas), bismuth oxide ( $\text{Bi}_2\text{O}_3$ , 99.9%, Adamas), and hydroiodic acid (HI, 40%, Aladdin). Compound **1** was synthesized by mixing 4-aminomethyl-1-cyclohexane carboxylate,  $\text{Ag}_2\text{O}$  and  $\text{Bi}_2\text{O}_3$  in concentrated hydroiodic acid solution according to stoichiometric ratio. At the beginning of the crystal growth, the saturated HI solution of **1** was prepared at 328 K and then maintained at 338 K for twelve hours. Subsequently, the high-quality crystal seed was slowly dipped into the solution and the top-seeded growth method was used for crystal growth. Large-size red crystals were obtained by the temperature cooling method from the saturated solution with a cooling rate of 1 K/day, as shown in Figures 1a and S1.

*Material characterization:* X-ray diffraction analysis was performed using the Bruker D8 diffractometer with the irradiation source Mo- $K\alpha$  ( $\lambda = 0.77 \text{ \AA}$ ). The single-crystal structure of **1** was obtained by direct method and refined by *SHELXTL* program using  $F^2$ -based full matrix method. Powder XRD analysis was performed on a Rigaku (Mini Flex 600) X-ray diffractometer equipped with Co- $K\alpha$  radiation. In addition, the absorption spectrum in the range of 200 to 900 nm was recorded using the PE Lambda 950 UV-VIS spectrophotometer.

*Computational details:* First-principles density function theory (DFT) calculations were performed using the plane-wave pseudopotential method implemented in the Cambridge Sequential Total Energy Package (CASTEP). The exchange-correlation effects were treated by the Perdew-Burke-Ernzerhof function for solids (PBEsol) in the generalized gradient approximation (GGA). The interactions between the ionic cores and the electrons were described by the norm-conserving pseudopotential. The orbital electrons of Ag ( $4d^{10}5s^1$ ), Bi ( $6s^26p^3$ ), I ( $5s^25p^5$ ), C ( $2s^22p^2$ ), N ( $2s^22p^3$ ), and H ( $1s^1$ ) were regarded as valence electrons.

*Device fabrication:* The vertical-type detectors were fabricated both perpendicular and

parallel to the (-100) crystal faces of the same single crystal. The surface was cleaned under nitrogen flow prior to device fabrication. Silver electrodes were evaporated onto opposite sides of the  $\sim 1$  mm thick single crystals with an electrode area of  $\sim 1.1$  mm<sup>2</sup> in the direction perpendicular to (-100) crystal face. Parallel to the (-100) plane, the spacing and area of the electrode are about 1.7 mm and 1.2 mm<sup>2</sup>, respectively.

*X-ray detection:* The  $I$ - $V$  and  $I$ - $t$  curves under X-ray irradiation were recorded by using a Keithley 6517B high-precision electrometer. The photoelectric and X-ray detection measurements were conducted in a short time to exclude the influence of dark current drift on the response signal. The X-ray source is a commercially available silver target X-ray tube with photon energy up to 50 keV and peak intensity of 20 keV (4 W, Mini-X2, Amptek). By adjusting the tube current, the dose rate of the X-ray tube can be controlled and measured in integral mode using a commercial X-ray dosimeter (Accu-Gold, Radcal) attached to the ion chamber (10X 6-180 models).

[CCDC 2388392 contains the supplementary crystallographic data for this paper. These data can be obtained free of charge from The Cambridge Crystallographic Data Centre via [www.ccdc.cam.ac.uk/data\\_request/cif](http://www.ccdc.cam.ac.uk/data_request/cif).]

**Figure**

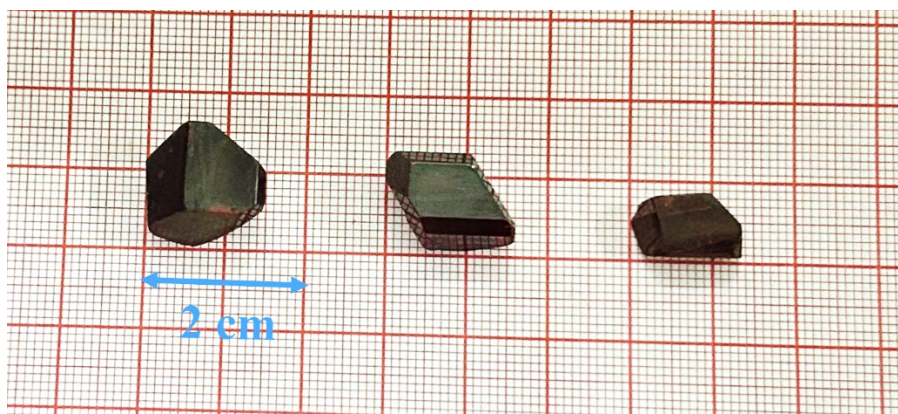

**Figure S1.** Block single crystals of **1** obtained by the temperature cooling method.

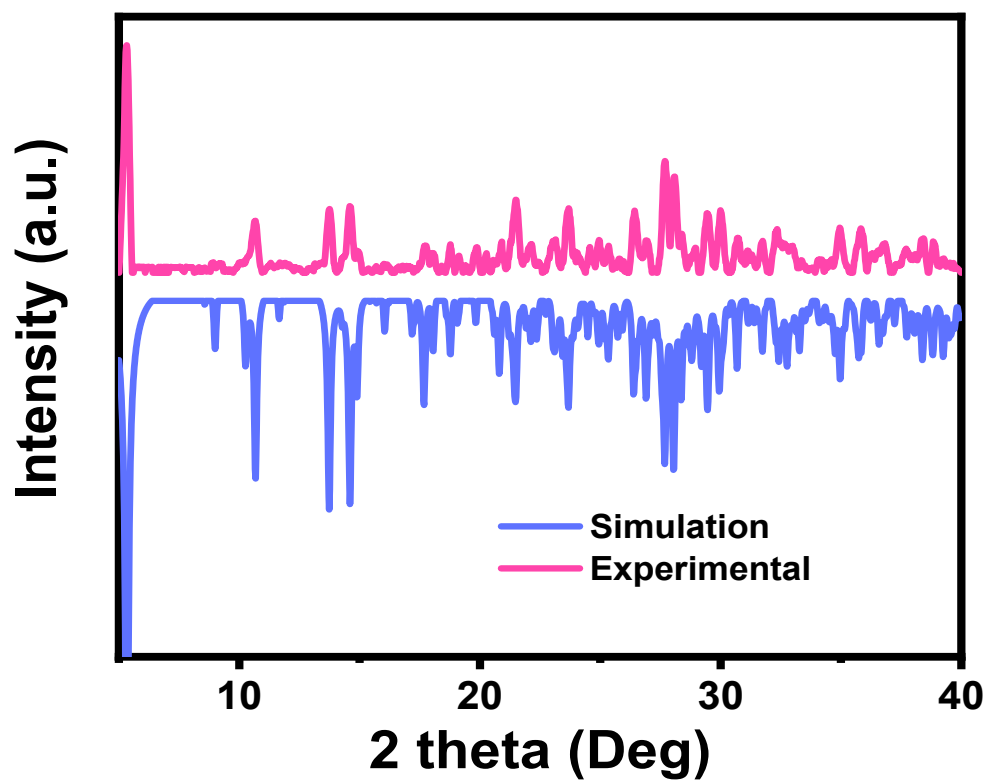

**Figure S2.** Experimental and simulated PXRD patterns for **1** at room temperature.

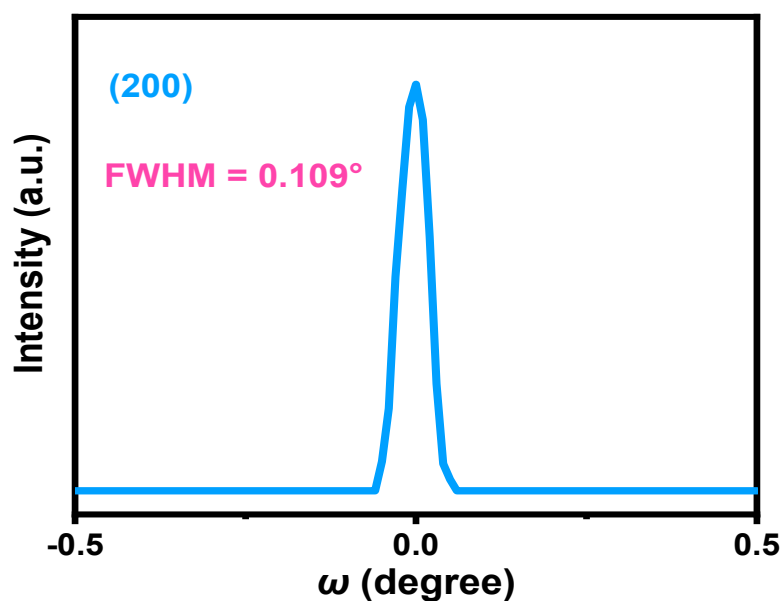

**Figure S3.** High-resolution XRD rocking curves for the diffraction peaks at (200).

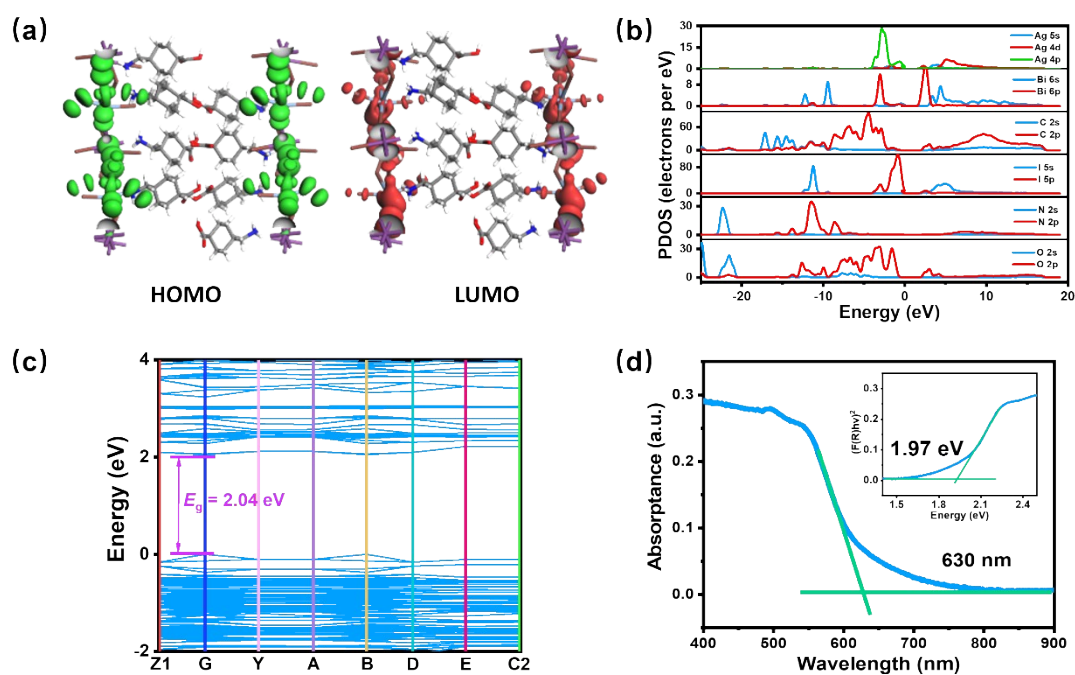

**Figure S4.** Optical absorption and electronic structure of **1**. The DFT calculations include (a) charge-density isosurfaces for HOMO and LUMO orbitals, (b) PDOS profiles, and (c) band structure. (d) The absorption spectrum and the estimated bandgap (inset) of **1**.

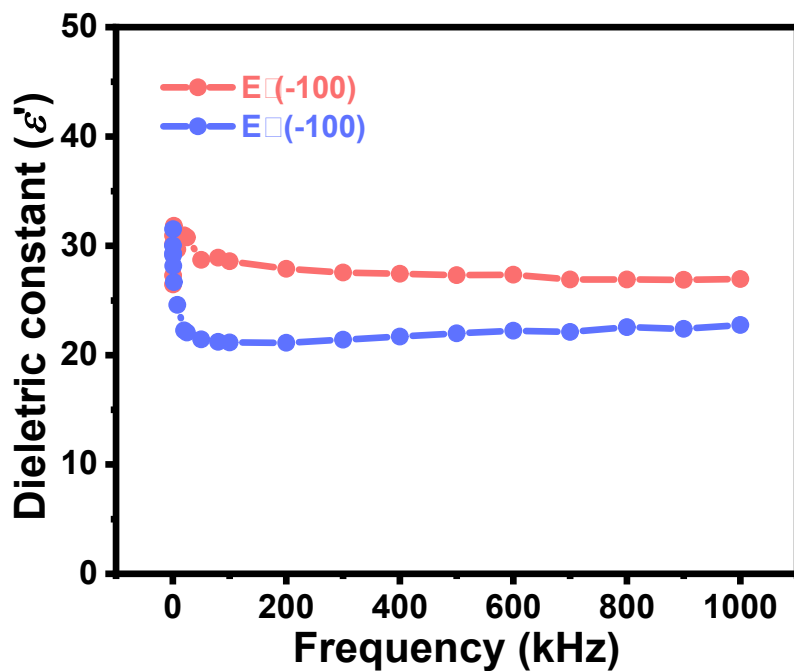

**Figure S5.** Frequency-dependent dielectric constant curves in both directions vertical and parallel (-100) crystal planes.

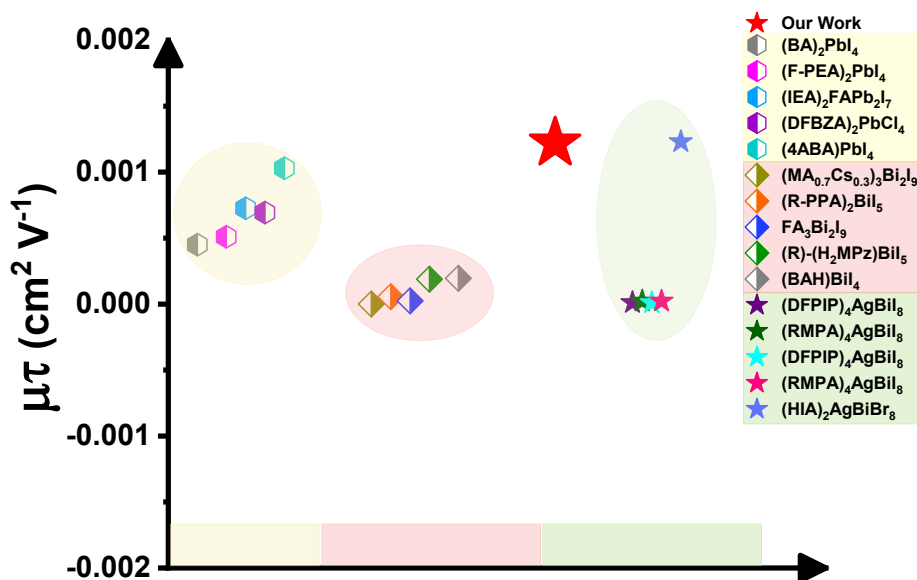

**Figure S6.** Photoconductivity of some reported organic-inorganic halide perovskite X-ray single crystal detectors.<sup>[1-15]</sup>

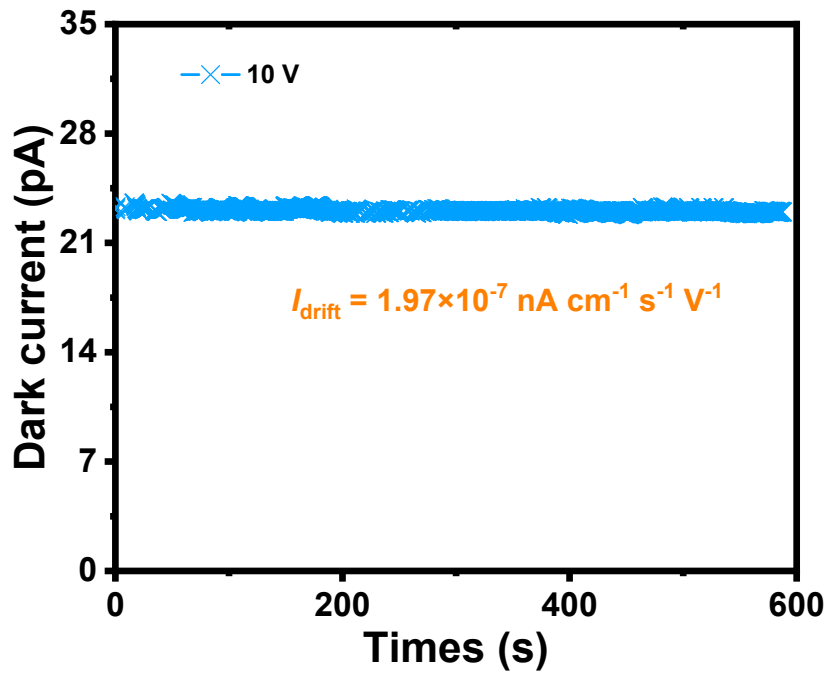

Figure S7. Dark current drift measured at 10 V bias.

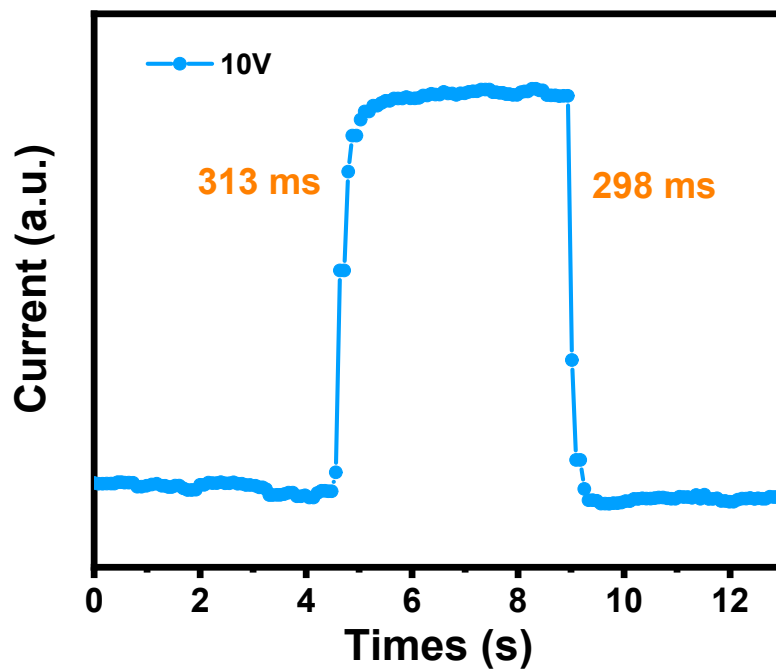

Figure S8. Response time of 1 under X-ray radiation.

## Table

**Table S1.** Crystal data for **1** collected at 300 K

|                                           | <b>1</b>                                                                        |
|-------------------------------------------|---------------------------------------------------------------------------------|
| Empirical formula                         | C <sub>32</sub> H <sub>66</sub> AgBi <sub>8</sub> N <sub>4</sub> O <sub>9</sub> |
| Formula weight                            | 1982.93                                                                         |
| Temperature (K)                           | 300.02                                                                          |
| Crystal system                            | monoclinic                                                                      |
| Space group                               | <i>P</i> 2 <sub>1</sub> / <i>C</i>                                              |
| <i>a</i> (Å)                              | 16.5743(10)                                                                     |
| <i>b</i> (Å)                              | 17.0633(8)                                                                      |
| <i>c</i> (Å)                              | 19.6604(11)                                                                     |
| <i>V</i> (Å <sup>3</sup> )                | 5554.8(5)                                                                       |
| <i>Z</i>                                  | 4                                                                               |
| $\mu$ (mm <sup>-1</sup> )                 | 8.006                                                                           |
| F (000)                                   | 3648.0                                                                          |
| 2 $\theta$ range (°)                      | 4.786 to 50.052                                                                 |
| Index ranges                              | -19 $\leq h \leq$ 19, -20 $\leq k \leq$ 20, -23 $\leq l \leq$ 23                |
| Reflections collected                     | 88286                                                                           |
| Independent reflections                   | 9719 [ $R_{\text{int}} = 0.0751$ , $R_{\text{sigma}} = 0.0362$ ]                |
| Data/restraints/parameters                | 9719/331/506                                                                    |
| Goodness-of-fit on $F^2$                  | 1.028                                                                           |
| Final $R$ indexes [ $I \geq 2\sigma(I)$ ] | $R_1 = 0.0457$ , $wR_2 = 0.1052$                                                |
| Final $R$ indexes [all data]              | $R_1 = 0.0653$ , $wR_2 = 0.1184$                                                |



**Table S2.** Bond lengths of crystal **1** at 300 K

| Atom | Atom             | Length/Å   | Atom | Atom | Length/Å   |
|------|------------------|------------|------|------|------------|
| Bi1  | I2 <sup>1</sup>  | 3.0839(6)  | C23  | C20  | 1.522(14)  |
| Bi1  | I2               | 3.0840(6)  | C31  | C28  | 1.530(14)  |
| Bi1  | I3               | 3.0677(7)  | C24  | C25  | 1.526(15)  |
| Bi1  | I3 <sup>1</sup>  | 3.0677(7)  | C2   | C1   | 1.510(14)  |
| Bi1  | I1               | 3.0474(8)  | C2   | C7   | 1.532(15)  |
| Bi1  | I1 <sup>1</sup>  | 3.0475(8)  | C2   | C3   | 1.505(14)  |
| Bi2  | I4               | 3.0857(6)  | C9   | C10  | 1.515(13)  |
| Bi2  | I4 <sup>2</sup>  | 3.0857(6)  | C32  | C22  | 1.513(16)  |
| Bi2  | I6 <sup>2</sup>  | 3.0806(6)  | C32  | C18  | 1.488(15)  |
| Bi2  | I6               | 3.0806(6)  | C8   | C5   | 1.468(17)  |
| Bi2  | I5 <sup>2</sup>  | 3.0640(7)  | C8   | O1   | 1.2498(10) |
| Bi2  | I5               | 3.0639(7)  | C20  | C21  | 1.510(16)  |
| I4   | Ag1 <sup>3</sup> | 4.112(2)   | C20  | C19  | 1.508(15)  |
| I2   | Ag1 <sup>4</sup> | 3.363(2)   | C28  | C29  | 1.501(12)  |
| I6   | Ag1              | 3.230(2)   | C28  | C27  | 1.501(13)  |
| I7   | Ag1              | 2.6772(15) | C22  | C21  | 1.530(15)  |
| I8   | Ag1              | 2.6429(14) | C15  | C14  | 1.530(16)  |
| I3   | Ag1 <sup>5</sup> | 3.638(2)   | C15  | C10  | 1.492(15)  |
| N3   | C17              | 1.499(14)  | C11  | C12  | 1.539(16)  |
| O3   | C16              | 1.242(13)  | C11  | C10  | 1.457(15)  |
| O5   | C23              | 1.254(13)  | C14  | C13  | 1.531(18)  |
| O7   | C31              | 1.259(13)  | C13  | C12  | 1.588(18)  |
| O4   | C16              | 1.230(15)  | C29  | C30  | 1.526(13)  |
| O6   | C23              | 1.226(13)  | C30  | C25  | 1.476(14)  |
| N2   | C9               | 1.445(15)  | C27  | C26  | 1.511(13)  |
| N4   | C24              | 1.429(15)  | C26  | C25  | 1.478(14)  |
| O8   | C31              | 1.190(13)  | C6   | C5   | 1.526(15)  |
| N1   | C1               | 1.433(14)  | C6   | C7   | 1.535(14)  |

|     |     |           |     |     |           |
|-----|-----|-----------|-----|-----|-----------|
| O2  | C8  | 1.155(16) | C5  | C4  | 1.568(16) |
| C17 | C32 | 1.534(14) | C3  | C4  | 1.502(14) |
| C16 | C13 | 1.511(16) | C18 | C19 | 1.532(14) |

Symmetry transformations used to generate equivalent atoms: <sup>1</sup>2-X, 1-Y 1-Z; <sup>2</sup>-X, -Y, 1-Z; <sup>3</sup>X, 1/2-Y, -1/2+Z; <sup>4</sup>1-X, 1/2+Y, 3/2-Z; <sup>5</sup>1+X, Y, Z

**Table S3.** Bond angles of crystal **1** at 300 K.

| Bond                                 | Angle/°    | Bond        | Angle/°   |
|--------------------------------------|------------|-------------|-----------|
| I2 <sup>1</sup> -Bi1-I2              | 180.00(3)  | N4-C24-C25  | 113.2(11) |
| I3 <sup>1</sup> -Bi1-I2              | 90.648(19) | C1-C2-C7    | 113.5(9)  |
| I3-Bi1-I2                            | 89.351(19) | C3-C2-C1    | 112.1(9)  |
| I3 <sup>1</sup> -Bi1-I2 <sup>1</sup> | 89.351(19) | C3-C2-C7    | 110.6(9)  |
| I3-Bi1-I2 <sup>1</sup>               | 90.650(19) | N1-C1-C2    | 114.1(9)  |
| I3-Bi1-I3 <sup>1</sup>               | 180.0      | N2-C9-C10   | 113.1(10) |
| I1-Bi1-I2 <sup>1</sup>               | 89.43(2)   | C22-C32-C17 | 106.8(9)  |
| I1-Bi1-I2                            | 90.57(2)   | C18-C32-C17 | 113.4(10) |
| I1 <sup>1</sup> -Bi1-I2              | 89.43(2)   | C18-C32-C22 | 109.5(10) |
| I1 <sup>1</sup> -Bi1-I2 <sup>1</sup> | 90.57(2)   | O2-C8-C5    | 126.6(12) |
| I1-Bi1-I3 <sup>1</sup>               | 89.85(3)   | O2-C8-O1    | 114.7(14) |
| I1-Bi1-I3                            | 90.15(2)   | O1-C8-C5    | 118.4(13) |
| I1 <sup>1</sup> -Bi1-I3 <sup>1</sup> | 90.15(2)   | C21-C20-C23 | 107.9(9)  |
| I1 <sup>1</sup> -Bi1-I3              | 89.85(3)   | C19-C20-C23 | 114.5(9)  |
| I1-Bi1-I1 <sup>1</sup>               | 180.0      | C19-C20-C21 | 110.0(10) |
| I4-Bi2-I4 <sup>2</sup>               | 180.0      | C29-C28-C31 | 114.2(10) |
| I6 <sup>2</sup> -Bi2-I4 <sup>2</sup> | 89.380(18) | C27-C28-C31 | 109.3(9)  |
| I6 <sup>2</sup> -Bi2-I4              | 90.619(18) | C27-C28-C29 | 108.7(10) |
| I6-Bi2-I4                            | 89.379(18) | C32-C22-C21 | 109.9(10) |
| I6-Bi2-I4 <sup>2</sup>               | 90.622(18) | C10-C15-C14 | 110.3(10) |
| I6-Bi2-I6 <sup>2</sup>               | 180.0      | C10-C11-C12 | 111.0(10) |
| I5 <sup>2</sup> -Bi2-I4              | 89.871(19) | C15-C14-C13 | 110.6(11) |
| I5-Bi2-I4                            | 90.129(19) | C20-C21-C22 | 111.2(10) |

|                                      |            |             |           |
|--------------------------------------|------------|-------------|-----------|
| I5-Bi2-I4 <sup>2</sup>               | 89.870(19) | C16-C13-C14 | 109.1(11) |
| I5 <sup>2</sup> -Bi2-I4 <sup>2</sup> | 90.130(19) | C16-C13-C12 | 107.4(11) |
| I5-Bi2-I6                            | 89.88(2)   | C14-C13-C12 | 107.8(10) |
| I5-Bi2-I6 <sup>2</sup>               | 90.12(2)   | C28-C29-C30 | 111.5(10) |
| I5 <sup>2</sup> -Bi2-I6              | 90.12(2)   | C25-C30-C29 | 112.0(11) |
| I5 <sup>2</sup> -Bi2-I6 <sup>2</sup> | 89.88(2)   | C28-C27-C26 | 111.3(12) |
| I5-Bi2-I5 <sup>2</sup>               | 180.0      | C11-C12-C13 | 109.2(11) |
| Bi2-I4-Ag1 <sup>3</sup>              | 143.58(3)  | C25-C26-C27 | 111.5(12) |
| Bi1-I2-Ag1 <sup>4</sup>              | 169.13(4)  | C5-C6-C7    | 112.6(9)  |
| Bi2-I6-Ag1                           | 156.91(4)  | C8-C5-C6    | 111.0(10) |
| Bi1-I3-Ag1 <sup>5</sup>              | 162.17(4)  | C8-C5-C4    | 109.6(10) |
| I7-Ag1-I6                            | 98.36(5)   | C6-C5-C4    | 110.2(9)  |
| I8-Ag1-I6                            | 102.89(6)  | C2-C7-C6    | 111.2(9)  |
| I8-Ag1-I7                            | 156.58(8)  | C4-C3-C2    | 112.5(9)  |
| N3-C17-C32                           | 112.6(10)  | C30-C25-C24 | 111.5(11) |
| O3-C16-C13                           | 117.6(11)  | C30-C25-C26 | 109.5(12) |
| O4-C16-O3                            | 120.2(11)  | C26-C25-C24 | 110.3(11) |
| O4-C16-C13                           | 122.1(11)  | C15-C10-C9  | 109.9(9)  |
| O5-C23-C20                           | 117.4(10)  | C11-C10-C9  | 113.6(10) |
| O6-C23-O5                            | 121.3(10)  | C11-C10-C15 | 113.0(11) |
| O6-C23-C20                           | 121.2(10)  | C3-C4-C5    | 111.5(10) |
| O7-C31-C28                           | 114.0(10)  | C32-C18-C19 | 111.2(10) |
| O8-C31-O7                            | 122.9(11)  | C20-C19-C18 | 110.0(10) |
| O8-C31-C28                           | 123.0(10)  |             |           |

---

Symmetry transformations used to generate equivalent atoms: <sup>1</sup>2-X, 1-Y, 1-Z; <sup>2</sup>-X, -Y, 1-Z; <sup>3</sup>X, 1/2-Y, -1/2+Z; <sup>4</sup>1-X, 1/2+Y, 3/2-Z; <sup>5</sup>1+X, Y, Z

**Table S4.** Performances of some reported halide perovskite X-ray single crystal detectors.

| Materials                                                 | Sensitivity<br>( $\mu\text{C Gy}_{\text{air}}^{-1}\text{cm}^{-2}$ ) | Detection limit<br>( $\text{nGy}_{\text{air}}\text{S}^{-1}$ ) | References |
|-----------------------------------------------------------|---------------------------------------------------------------------|---------------------------------------------------------------|------------|
| $\text{MA}_3\text{Bi}_2\text{I}_9$                        | 1947                                                                | 83                                                            | [16]       |
| $\text{Cs}_3\text{Bi}_2\text{I}_9$                        | 1652.3                                                              | 130                                                           | [17]       |
| $(\text{MA}_{0.7}\text{Cs}_{0.3})_3\text{Bi}_2\text{I}_9$ | 130                                                                 | 12.8                                                          | [6]        |
| $(\text{R-PPA})_2\text{BiI}_5$                            | 150                                                                 | 2570                                                          | [7]        |
| $\text{Rb}_3\text{Bi}_2\text{I}_9$                        | 42.5                                                                | 8.32                                                          | [18]       |
| $(\text{BAH})\text{BiI}_4$                                | 1181.8                                                              | 77                                                            | [10]       |
| $(\text{DFPIP})_4\text{AgBiI}_8$                          | 188                                                                 | 3130                                                          | [11]       |
| $(\text{RMPA})_4\text{AgBiI}_8$                           | 949.6                                                               | 85                                                            | [12]       |
| $(\text{HIS})_2\text{AgSbBr}_8$                           | 223                                                                 | 84.2                                                          | [19]       |
| $\text{FA}_3\text{Bi}_2\text{I}_9$                        | 598.1                                                               | 200                                                           | [8]        |
| $(\text{DMEDA})\text{BiI}_5$                              | 72.5                                                                | -                                                             | [20]       |
| $(t\text{-ACH})_4\text{AgBiI}_8 \cdot \text{H}_2\text{O}$ | 3221.6                                                              | 12                                                            | Our Work   |

### Reference

- [1] Yukta, J. Ghosh, M. Afroz, S. Alghamdi, P. Sellin and S. Satapathi, *ACS Photonics*, 2022, **9**, 3529.
- [2] H. Li, J. Song, W. Pan, D. Xu, W. Zhu, H. Wei and B. Yang, *Adv. Mater.*, 2020, **32**, 2003790.
- [3] D. Fu, Y. Zhang, Z. Chen, L. Pan, Y. He and J. Luo, *Small*, 2024, 2403198.
- [4] X. Zeng, Y. Liu, Y. Chen, Qi. Fan, T. Yang, L. Tang, W. Guo, Y. Ma, J. Luo and Z. Sun, *ACS Energy Lett.*, 2024, **9**, 381-387.
- [5] Q. Fan, Y. Ma, S. You, H. Xu, W. Guo, Y. Liu, L. Tang, W. Li, J. Luo and Z. Sun, *Adv. Funct. Mater.*, 2024, **34**, 2312395.
- [6] S. Tie, D. Xin, S. Dong, B. Cai, J. Zhu and X. Zheng, *ACS Sustain. Chem. & Eng.*, 2022, **10**, 10743-10751.
- [7] S. You, Z. Zhu, S. Dai, J. Wu, Q. Guan, T. Ting, P. Yu, C. Chen, Q. Chen and J. Luo, *Adv. Funct. Mater.*, 2023, **33**, 2303523.

- [8] W. Li, D. Xin, S. Tie, J. Ren, S. Dong, L. Lei, X. Zheng, Y. Zhao and W. Zhang, *J. Phys. Chem. Lett.*, 2021, **12**, 1778-1785.
- [9] X. Dong, J. Liang, Z. Xu, H. Wu, L. Wang, S. You, J. Luo and L. Li, *Chinese Chem. Lett.*, 2024, **35**, 108708.
- [10] C. Ma, H. Li, M. Chen, Y. Liu, K. Zhao and S. Liu, *Adv. Funct. Mater.*, 2022, **32**, 2202160.
- [11] C. Wang, H. Li, M. Li, Y. Cui, X. Song, Q. Wang, J. Jiang, M. Hua, Q. Xu, K. Zhao, H. Ye and Y. Zhang, *Adv. Funct. Mater.*, 2021, **31**, 2009457.
- [12] J. Wu, S. You, P. Yu, Q. Guan, Z. Zhu, Z. Li, C. Qu, H. Zhong, L. Li and J. Luo, *ACS Energy Lett.*, 2023, **8**, 2809.
- [13] C. Wang, H. Li, M. Li, Y. Cui, X. Song, Q. Wang, J. Jiang, M. Hua, Q. Xu, K. Zhao, H. Ye and Y. Zhang, *Adv. Funct. Mater.*, 2021, **31**, 2009457.
- [14] J. Wu, S. You, P. Yu, Q. Guan, Z. Zhu, Z. Li, C. Qu, H. Zhong, L. Li and J. Luo, *ACS Energy Lett.*, 2023, **8**, 2809-2816.
- [15] W. Guo, H. Xu, Q. Fan, P. Zhu, Y. Ma, Y. Liu, X. Zeng, J. Luo and Z. Sun, *Adv. Optical Mater.*, 2024, **12**, 2303291.
- [16] Y. Liu, Z. Xu, Z. Yang, Y. Zhang, J. Cui, Y. He, H. Ye, K. Zhao, H. Sun, R. Liu, M. Liu, M. G. Kanatzidis and S. Liu, *Matter*, 2020, **3**, 180-196.
- [17] Y. Zhang, Y. Liu, Z. Xu, H. Ye, Z. Yang, J. You, M. Liu, Y. He, M. G. Kanatzidis and S. Liu, *Nat. Commun.*, 2020, **11**, 2304.
- [18] M. Xia, H. Yuan, G. Niu, X. Du, L. Yin, W. Pan, J. Luo, Z. Li, H. Zhao, H. Xue, X. Miao and J. Tang, *Adv. Funct. Mater.*, 2020, **30**, 1910648.
- [19] Q. Fan, H. Xu, S. You, Y. Ma, Y. Liu, W. Guo, X. Hu, B. Wang, C. Gao, W. Liu, J. Luo and Z. Sun, *Small*, 2023, **19**, 2301594.
- [20] L. Yao, G. Niu, L. Yin, X. Du, Y. Lin, X. Den, J. Zhang and J. Tang, *J. Mater. Chem. C.*, 2020, **8**, 1239-1243.
